# Supplementary material for: Deep eutectic solvent route synthesis of zinc and copper vanadate n-type semiconductors – mapping oxygen vacancies and their effect on photovoltage
Source: Royal Society of Chemistry journal article supplement (doi:10.1039/c9ta00957d), 2019-01-01
Supplement: c9ta00957d1.pdf [file c9ta00957d1.pdf]

## Deep eutectic solvent route synthesis of zinc and copper vanadate *n*-type semiconductors – mapping oxygen vacancies and their effect on photovoltage

Sangki Hong,<sup>1</sup> Rachel M. Doughty,<sup>2</sup> Frank E. Osterloh,<sup>2</sup> Julia V. Zaikina<sup>1</sup>

<sup>1</sup> Department of Chemistry, Iowa State University, Ames, Iowa 50011, United States

<sup>2</sup> Department of Chemistry, University of California at Davis, Davis, California 95616, United States

### Supporting Information

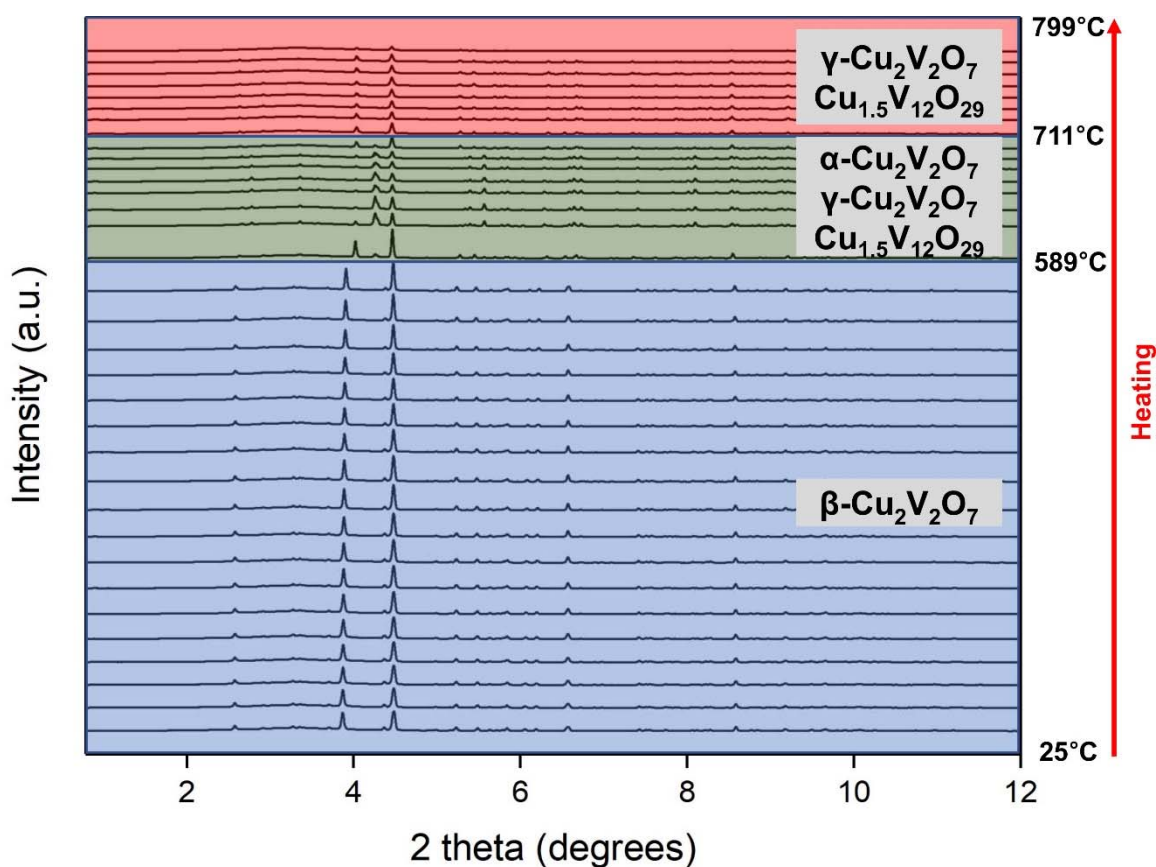

Figure S1. In-situ high-temperature powder X-ray diffraction (HT PXRD) patterns of  $\beta\text{-Cu}_2\text{V}_2\text{O}_7$ .

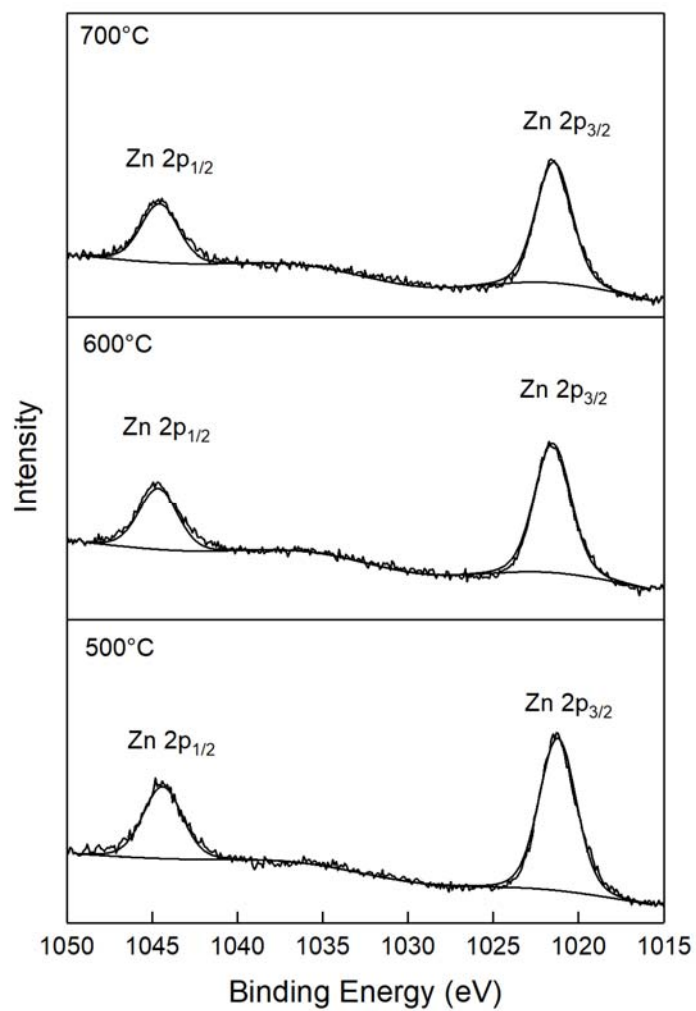

Figure S2. XPS data of the Zn 2p region for  $\alpha$ -Zn<sub>2</sub>V<sub>2</sub>O<sub>7</sub>.

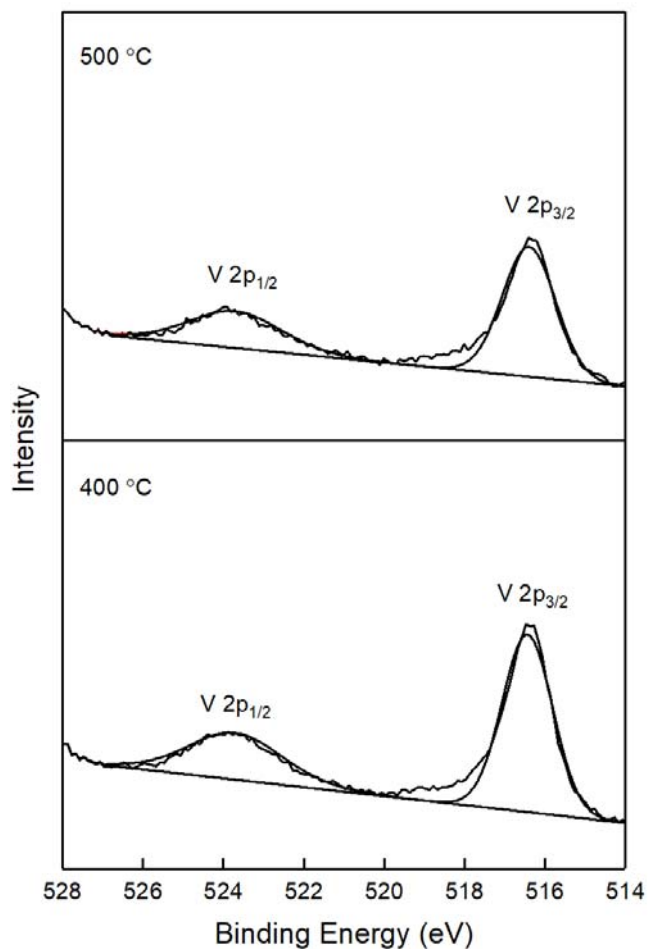

Figure S3. XPS data of the V 2p region for  $\beta$ - $\text{Cu}_2\text{V}_2\text{O}_7$ .

Table S1. Estimated particle size of  $\alpha$ - $\text{Zn}_2\text{V}_2\text{O}_7$  and  $\beta$ - $\text{Cu}_2\text{V}_2\text{O}_7$  calculated by Debye-Scherrer equation and atomic % ratio of V:Zn(Cu) by EDS.

| $\text{M}_2\text{V}_2\text{O}_7$             | Calcination Temperature (°C) | Particle size (nm) | V:Zn(Cu) ratio <sup>[a]</sup> |
|----------------------------------------------|------------------------------|--------------------|-------------------------------|
| $\alpha$ - $\text{Zn}_2\text{V}_2\text{O}_7$ | 500                          | $50.5 \pm 3.5$     | 1.95(8) : 2                   |
|                                              | 600                          | $57.4 \pm 4.4$     | 1.93(4) : 2                   |
|                                              | 700                          | $56.6 \pm 6.0$     | 1.94(7) : 2                   |
| $\beta$ - $\text{Cu}_2\text{V}_2\text{O}_7$  | 400                          | $42.0 \pm 7.9$     | 1.92(6) : 2                   |
|                                              | 500                          | $61.0 \pm 3.5$     | 1.95(3) : 2                   |

<sup>[a]</sup> The average atomic % ratio from different spots was taken.
